# Supplementary material for: Solid-state electrochemical oxidation with polyelectrolyte membrane stamps for micro-/nanoscale pattern formation on Au surfaces
Source: Royal Society of Chemistry journal article supplement (doi:10.1039/d4nr02978j), 2024-01-01
Supplement: d4nr02978j1.xlsx [file d4nr02978j1.xlsx]

## Sheet: Sheet1
E_B [eV]	Intensity
94.2	0.166851
94.15	0.176884
94.1	0.167446
94.05	0.171933
94	0.166706
93.95	0.173496
93.9	0.169121
93.85	0.169729
93.8	0.171901
93.75	0.166514
93.7	0.17088
93.65	0.16869
93.6	0.163599
93.55	0.167614
93.5	0.166425
93.45	0.164731
93.4	0.170899
93.35	0.164044
93.3	0.170876
93.25	0.167226
93.2	0.162981
93.15	0.170684
93.1	0.163023
93.05	0.169055
93	0.162457
92.95	0.169051
92.9	0.164905
92.85	0.162205
92.8	0.169692
92.75	0.172907
92.7	0.167914
92.65	0.171376
92.6	0.173463
92.55	0.17139
92.5	0.169336
92.45	0.173356
92.4	0.174091
92.35	0.180057
92.3	0.180193
92.25	0.178475
92.2	0.178026
92.15	0.176472
92.1	0.183103
92.05	0.186201
92	0.184765
91.95	0.182448
91.9	0.196066
91.85	0.192448
91.8	0.192069
91.75	0.194966
91.7	0.202346
91.65	0.201461
91.6	0.209819
91.55	0.209178
91.5	0.207545
91.45	0.224442
91.4	0.222917
91.35	0.218429
91.3	0.231906
91.25	0.229791
91.2	0.241331
91.15	0.259876
91.1	0.252482
91.05	0.262885
91	0.266853
90.95	0.283405
90.9	0.293498
90.85	0.29837
90.8	0.312109
90.75	0.329896
90.7	0.348731
90.65	0.373224
90.6	0.377313
90.55	0.398287
90.5	0.428957
90.45	0.448812
90.4	0.470703
90.35	0.485481
90.3	0.51003
90.25	0.54639
90.2	0.579928
90.15	0.603621
90.1	0.629016
90.05	0.657496
90	0.67342
89.95	0.697216
89.9	0.717478
89.85	0.751737
89.8	0.767264
89.75	0.766815
89.7	0.786534
89.65	0.781097
89.6	0.78645
89.55	0.775107
89.5	0.773385
89.45	0.752622
89.4	0.739631
89.35	0.739276
89.3	0.705765
89.25	0.686467
89.2	0.661104
89.15	0.638694
89.1	0.622217
89.05	0.599255
89	0.579259
88.95	0.570096
88.9	0.536371
88.85	0.542997
88.8	0.530306
88.75	0.521008
88.7	0.504419
88.65	0.510961
88.6	0.517072
88.55	0.51908
88.5	0.532393
88.45	0.542155
88.4	0.559001
88.35	0.58121
88.3	0.605329
88.25	0.636593
88.2	0.665816
88.15	0.702897
88.1	0.725583
88.05	0.752622
88	0.798125
87.95	0.835538
87.9	0.85611
87.85	0.896377
87.8	0.918118
87.75	0.928291
87.7	0.934632
87.65	0.941988
87.6	0.934015
87.55	0.929391
87.5	0.933682
87.45	0.917706
87.4	0.909835
87.35	0.86238
87.3	0.828458
87.25	0.803605
87.2	0.771251
87.15	0.752186
87.1	0.730258
87.05	0.718999
87	0.706037
86.95	0.69226
86.9	0.692532
86.85	0.690183
86.8	0.694932
86.75	0.696551
86.7	0.709097
86.65	0.722177
86.6	0.744484
86.55	0.757736
86.5	0.777358
86.45	0.796558
86.4	0.834626
86.35	0.846077
86.3	0.873737
86.25	0.893504
86.2	0.92648
86.15	0.936387
86.1	0.949859
86.05	0.957131
86	0.976753
85.95	0.975807
85.9	0.967726
85.85	0.954263
85.8	0.931413
85.75	0.91795
85.7	0.878506
85.65	0.86567
85.6	0.823465
85.55	0.795912
85.5	0.765121
85.45	0.740862
85.4	0.703084
85.35	0.661006
85.3	0.635886
85.25	0.618015
85.2	0.589596
85.15	0.566072
85.1	0.546839
85.05	0.533273
85	0.529104
84.95	0.53047
84.9	0.532323
84.85	0.537747
84.8	0.540508
84.75	0.566615
84.7	0.588225
84.65	0.606971
84.6	0.650879
84.55	0.676055
84.5	0.709331
84.45	0.753642
84.4	0.803479
84.35	0.833241
84.3	0.884646
84.25	0.924181
84.2	0.94117
84.15	0.97185
84.1	0.991433
84.05	1
84	0.992187
83.95	0.995835
83.9	0.971236
83.85	0.955171
83.8	0.935599
83.75	0.897083
83.7	0.835749
83.65	0.787953
83.6	0.722897
83.55	0.681935
83.5	0.621198
83.45	0.570069
83.4	0.520045
83.35	0.466088
83.3	0.424823
83.25	0.384478
83.2	0.348831
83.15	0.308988
83.1	0.282613
83.05	0.258672
83	0.227818
82.95	0.208702
82.9	0.186134
82.85	0.165772
82.8	0.150533
82.75	0.137165
82.7	0.120328
82.65	0.114713
82.6	0.0978619
82.55	0.0804886
82.5	0.084888
82.45	0.0726159
82.4	0.0696217
82.35	0.0651164
82.3	0.0593693
82.25	0.0516899
82.2	0.0536852
82.15	0.0454925
82.1	0.036263
82.05	0.0375373
82	0.0370709
81.95	0.0316811
81.9	0.0340359
81.85	0.0354775
81.8	0.0279038
81.75	0.0216861
81.7	0.0246458
81.65	0.0186067
81.6	0.0150675
81.55	0.0202958
81.5	0.0171696
81.45	0.0122088
81.4	0.0139505
81.35	0.00955035
81.3	0.0126318
81.25	0.00856289
81.2	0.00840308
81.15	0.00398346
81.1	0.00623106
81.05	0.00663275
81	0.010184
80.95	0.00577007
80.9	3.08259e-05
80.85	-4.24369e-05
80.8	0.000724034
80.75	0.00233065
80.7	-0.00221977
80.65	0.00314279
80.6	0.00150301
80.55	-0.0016927
80.5	-0.000572759
80.45	-0.00605501
80.4	-0.00623571
80.35	-0.00417862
80.3	-0.00498665
80.25	-0.00478397
80.2	-0.00713295
