# Supplementary material for: Solid-state electrochemical oxidation with polyelectrolyte membrane stamps for micro-/nanoscale pattern formation on Au surfaces
Source: Royal Society of Chemistry journal article supplement (doi:10.1039/d4nr02978j), 2024-01-01
Supplement: d4nr02978j2.xlsx [file d4nr02978j2.xlsx]

## Sheet: Sheet1
E_B [eV]	Intensity
94.2	0.0797157
94.15	0.0792193
94.1	0.0773177
94.05	0.0813031
94	0.0806465
93.95	0.0797209
93.9	0.0776331
93.85	0.0778141
93.8	0.0787307
93.75	0.0781994
93.7	0.0773733
93.65	0.075994
93.6	0.0756902
93.55	0.0783984
93.5	0.0775982
93.45	0.0782136
93.4	0.076471
93.35	0.0749986
93.3	0.0783415
93.25	0.0751757
93.2	0.0761543
93.15	0.0775814
93.1	0.0791185
93.05	0.0775827
93	0.0781192
92.95	0.0754653
92.9	0.0757057
92.85	0.0751137
92.8	0.078127
92.75	0.0782084
92.7	0.0794843
92.65	0.0768937
92.6	0.0760638
92.55	0.0775013
92.5	0.0767541
92.45	0.0799393
92.4	0.0770734
92.35	0.0804448
92.3	0.0789582
92.25	0.081541
92.2	0.0802018
92.15	0.0794778
92.1	0.0826993
92.05	0.0836016
92	0.0821331
91.95	0.0817802
91.9	0.0806529
91.85	0.0829785
91.8	0.086006
91.75	0.085785
91.7	0.0851373
91.65	0.0861224
91.6	0.0882644
91.55	0.0890969
91.5	0.0889974
91.45	0.0913837
91.4	0.0937274
91.35	0.0950085
91.3	0.0959676
91.25	0.0950356
91.2	0.0996596
91.15	0.100683
91.1	0.103385
91.05	0.107033
91	0.107047
90.95	0.112588
90.9	0.116003
90.85	0.117928
90.8	0.119
90.75	0.125188
90.7	0.130261
90.65	0.132187
90.6	0.13606
90.55	0.139913
90.5	0.147198
90.45	0.153268
90.4	0.155721
90.35	0.166385
90.3	0.170872
90.25	0.180617
90.2	0.183992
90.15	0.190834
90.1	0.203692
90.05	0.205349
90	0.217789
89.95	0.221327
89.9	0.229214
89.85	0.234944
89.8	0.243424
89.75	0.250144
89.7	0.252693
89.65	0.2555
89.6	0.257527
89.55	0.257359
89.5	0.258977
89.45	0.263313
89.4	0.263277
89.35	0.263225
89.3	0.260069
89.25	0.259378
89.2	0.258159
89.15	0.249997
89.1	0.253426
89.05	0.253403
89	0.253156
88.95	0.252896
88.9	0.259393
88.85	0.262028
88.8	0.261206
88.75	0.27323
88.7	0.27941
88.65	0.291175
88.6	0.302256
88.55	0.322284
88.5	0.337372
88.45	0.363588
88.4	0.390316
88.35	0.412616
88.3	0.449069
88.25	0.478194
88.2	0.521181
88.15	0.553534
88.1	0.593691
88.05	0.630326
88	0.670072
87.95	0.711607
87.9	0.743605
87.85	0.773679
87.8	0.792511
87.75	0.809534
87.7	0.815727
87.65	0.814594
87.6	0.818293
87.55	0.79911
87.5	0.778793
87.45	0.742681
87.4	0.705206
87.35	0.670226
87.3	0.632974
87.25	0.591408
87.2	0.54921
87.15	0.510237
87.1	0.47434
87.05	0.440016
87	0.40987
86.95	0.39006
86.9	0.361554
86.85	0.346616
86.8	0.330229
86.75	0.317161
86.7	0.308586
86.65	0.297586
86.6	0.294651
86.55	0.292794
86.5	0.291687
86.45	0.294947
86.4	0.291012
86.35	0.296427
86.3	0.301282
86.25	0.30106
86.2	0.30594
86.15	0.30583
86.1	0.312546
86.05	0.313588
86	0.318396
85.95	0.320008
85.9	0.317888
85.85	0.317629
85.8	0.313978
85.75	0.310339
85.7	0.309788
85.65	0.306104
85.6	0.303153
85.55	0.296475
85.5	0.296311
85.45	0.289994
85.4	0.283103
85.35	0.27898
85.3	0.278017
85.25	0.279386
85.2	0.283409
85.15	0.284551
85.1	0.288961
85.05	0.299408
85	0.311213
84.95	0.322403
84.9	0.340573
84.85	0.364488
84.8	0.391301
84.75	0.415893
84.7	0.449579
84.65	0.48939
84.6	0.539621
84.55	0.57786
84.5	0.628574
84.45	0.682396
84.4	0.740804
84.35	0.789309
84.3	0.832319
84.25	0.878146
84.2	0.912229
84.15	0.946731
84.1	0.982579
84.05	0.999692
84	1
83.95	0.994978
83.9	0.973049
83.85	0.937079
83.8	0.903274
83.75	0.846946
83.7	0.79268
83.65	0.726035
83.6	0.664949
83.55	0.604455
83.5	0.550185
83.45	0.487725
83.4	0.432046
83.35	0.389776
83.3	0.343727
83.25	0.304245
83.2	0.269111
83.15	0.240849
83.1	0.211819
83.05	0.185924
83	0.168957
82.95	0.148665
82.9	0.135297
82.85	0.119473
82.8	0.107388
82.75	0.0967731
82.7	0.0866835
82.65	0.0781235
82.6	0.0717917
82.55	0.0648862
82.5	0.0582812
82.45	0.0541524
82.4	0.0484597
82.35	0.0448839
82.3	0.0420265
82.25	0.0378183
82.2	0.0364958
82.15	0.0346141
82.1	0.0301277
82.05	0.0284839
82	0.0271232
81.95	0.0235283
81.9	0.0230106
81.85	0.0218153
81.8	0.0184652
81.75	0.0181404
81.7	0.0164298
81.65	0.0140391
81.6	0.0131848
81.55	0.0113518
81.5	0.0103173
81.45	0.010071
81.4	0.00926547
81.35	0.00908835
81.3	0.00741712
81.25	0.00693806
81.2	0.00583927
81.15	0.00481466
81.1	0.00344822
81.05	0.00432385
81	0.00145061
80.95	0.0023214
80.9	-2.96805e-05
80.85	0.00155488
80.8	-6.25567e-05
80.75	0.00141712
80.7	0.000619332
80.65	-0.00222514
80.6	-0.00190773
80.55	-0.00254821
80.5	-0.00122621
80.45	-0.00363759
80.4	-0.00185876
80.35	-0.00360241
80.3	-0.00495884
80.25	-0.00542341
80.2	-0.00542926
