# Supplementary material for: Solid-state electrochemical oxidation with polyelectrolyte membrane stamps for micro-/nanoscale pattern formation on Au surfaces
Source: Royal Society of Chemistry journal article supplement (doi:10.1039/d4nr02978j), 2024-01-01
Supplement: d4nr02978j3.xlsx [file d4nr02978j3.xlsx]

## Sheet: Sheet1
E_B [eV]	Intensity
94.2	0.0437228
94.15	0.0421453
94.1	0.0418529
94.05	0.0421749
94	0.0416303
93.95	0.0416876
93.9	0.0427205
93.85	0.0414516
93.8	0.0415624
93.75	0.0423784
93.7	0.0419895
93.65	0.0416274
93.6	0.0420507
93.55	0.0417755
93.5	0.0411105
93.45	0.0416274
93.4	0.0397776
93.35	0.0418042
93.3	0.0415233
93.25	0.0414162
93.2	0.0399572
93.15	0.0402496
93.1	0.0407665
93.05	0.0417325
93	0.0405754
92.95	0.0396362
92.9	0.0401999
92.85	0.0400499
92.8	0.0406882
92.75	0.0396916
92.7	0.0399152
92.65	0.0408926
92.6	0.0401216
92.55	0.0393295
92.5	0.0402572
92.45	0.0379641
92.4	0.0403318
92.35	0.0400834
92.3	0.0407283
92.25	0.0401713
92.2	0.0412681
92.15	0.0403624
92.1	0.0405057
92.05	0.0412051
92	0.0410035
91.95	0.0394938
91.9	0.041936
91.85	0.043073
91.8	0.0413073
91.75	0.0411258
91.7	0.0413694
91.65	0.0428638
91.6	0.0417984
91.55	0.043117
91.5	0.0430463
91.45	0.042237
91.4	0.0423937
91.35	0.0447499
91.3	0.0459376
91.25	0.0455668
91.2	0.0451808
91.15	0.0448913
91.1	0.0466771
91.05	0.046315
91	0.0480759
90.95	0.0463962
90.9	0.0471166
90.85	0.0482068
90.8	0.0490324
90.75	0.0490047
90.7	0.0506376
90.65	0.0510666
90.6	0.0510427
90.55	0.050307
90.5	0.0499448
90.45	0.0508506
90.4	0.0526555
90.35	0.0524807
90.3	0.0524788
90.25	0.0545436
90.2	0.0553328
90.15	0.0551025
90.1	0.0567326
90.05	0.0569705
90	0.056444
89.95	0.0587171
89.9	0.0583168
89.85	0.0584199
89.8	0.0601866
89.75	0.063032
89.7	0.0640219
89.65	0.0639818
89.6	0.0653539
89.55	0.0680302
89.5	0.0697309
89.45	0.0695799
89.4	0.0747166
89.35	0.0764938
89.3	0.0767097
89.25	0.0841691
89.2	0.082991
89.15	0.0896402
89.1	0.0955995
89.05	0.0972841
89	0.10286
88.95	0.108639
88.9	0.117664
88.85	0.123908
88.8	0.134878
88.75	0.146609
88.7	0.159035
88.65	0.171938
88.6	0.186572
88.55	0.205906
88.5	0.226028
88.45	0.251275
88.4	0.279197
88.35	0.308583
88.3	0.345582
88.25	0.377257
88.2	0.417632
88.15	0.459544
88.1	0.505097
88.05	0.539405
88	0.586583
87.95	0.626178
87.9	0.664342
87.85	0.695599
87.8	0.716894
87.75	0.739423
87.7	0.747627
87.65	0.741748
87.6	0.735088
87.55	0.716436
87.5	0.684658
87.45	0.645152
87.4	0.605475
87.35	0.562933
87.3	0.506667
87.25	0.458817
87.2	0.414581
87.15	0.369487
87.1	0.332438
87.05	0.296894
87	0.265195
86.95	0.23053
86.9	0.210482
86.85	0.191616
86.8	0.17448
86.75	0.160116
86.7	0.14389
86.65	0.132389
86.6	0.124852
86.55	0.114401
86.5	0.109209
86.45	0.10018
86.4	0.097715
86.35	0.0919573
86.3	0.0905603
86.25	0.0846822
86.2	0.0840755
86.15	0.0807103
86.1	0.0813314
86.05	0.0787525
86	0.0791022
85.95	0.0801294
85.9	0.0799201
85.85	0.0786532
85.8	0.0797558
85.75	0.0795284
85.7	0.0827331
85.65	0.0837
85.6	0.0858116
85.55	0.0888032
85.5	0.0933962
85.45	0.0986857
85.4	0.103268
85.35	0.107447
85.3	0.116701
85.25	0.123832
85.2	0.130869
85.15	0.14326
85.1	0.155995
85.05	0.167034
85	0.185827
84.95	0.201828
84.9	0.224138
84.85	0.251528
84.8	0.283381
84.75	0.315228
84.7	0.350018
84.65	0.397317
84.6	0.445151
84.55	0.497597
84.5	0.549995
84.45	0.611058
84.4	0.666222
84.35	0.735022
84.3	0.794785
84.25	0.850567
84.2	0.908074
84.15	0.948086
84.1	0.979825
84.05	1
84	0.998179
83.95	0.993148
83.9	0.964167
83.85	0.928523
83.8	0.882743
83.75	0.828774
83.7	0.752113
83.65	0.683427
83.6	0.607026
83.55	0.534634
83.5	0.472864
83.45	0.41327
83.4	0.35806
83.35	0.313376
83.3	0.268235
83.25	0.232662
83.2	0.205024
83.15	0.177087
83.1	0.153179
83.05	0.136857
83	0.120157
82.95	0.104512
82.9	0.0934682
82.85	0.0829288
82.8	0.076308
82.75	0.0677479
82.7	0.0623159
82.65	0.0550204
82.6	0.0505816
82.55	0.046939
82.5	0.0408696
82.45	0.0406626
82.4	0.0340722
82.35	0.0312886
82.3	0.0300552
82.25	0.0278331
82.2	0.026306
82.15	0.0250823
82.1	0.0227345
82.05	0.0212586
82	0.0185054
81.95	0.0182387
81.9	0.0161803
81.85	0.0158459
81.8	0.0137555
81.75	0.0127407
81.7	0.0116247
81.65	0.0109969
81.6	0.0110642
81.55	0.010002
81.5	0.00896418
81.45	0.00808363
81.4	0.00752058
81.35	0.00619017
81.3	0.00532362
81.25	0.00458017
81.2	0.00439079
81.15	0.00310469
81.1	0.00332049
81.05	0.00313322
81	0.00297492
80.95	0.0010919
80.9	0.000552182
80.85	0.0016534
80.8	0.00121333
80.75	0.00119786
80.7	0.00206179
80.65	4.96687e-05
80.6	-8.14154e-05
80.55	-0.00169614
80.5	-0.00167557
80.45	-0.0010666
80.4	-0.00299055
80.35	-0.00178401
80.3	-0.00255793
80.25	-0.00247037
80.2	-0.0019888
